# Supplementary material
Source: PubMed Central journal article supplement (PMC4263859)
Supplement: supp_M114.591685_jbc.M114.591685-1.pdf [file supp_M114.591685_jbc.M114.591685-1.pdf]

## SUPPLEMENTARY DATA

### **WASp Family Verprolin-Homologous Protein-2 (WAVE2) and Wiskott-Aldrich Syndrome Protein (WASp) Engage in Distinct Downstream Signaling Interactions at the T Cell Antigen Receptor Site**

**Maor H. Pauker, Barak Reicher, Noah Joseph, Inbal Wortzel, Shlomi Jakubowicz, Elad Noy, Orly Perl, and Mira Barda-Saad**

**SUPPLEMENTARY MOVIE S1.** *Dynamic movement of YFP-WAVE2 (yellow) in live activated T cells-* Jurkat E6.1 cells stably expressing YFP-WAVE2 were dropped onto stimulatory coverslips coated with monoclonal anti-CD3 antibody and observed dynamically using the Zeiss LSM510 Meta confocal microscope. Seven images consisting of 0.5  $\mu\text{m}$  deep Z-stacks were collected every 28.5 sec. Image slices near the coverslip were selected and exported as QuickTime movies. Playback rates were 172 $\times$  faster than real time.

**SUPPLEMENTARY MOVIE S2.** *Dynamic movement of YFP-WAVE2 (yellow) in live activated T cells-* Jurkat E6.1 cells stably expressing YFP-WAVE2 were dropped onto stimulatory coverslips coated with monoclonal anti-CD3 antibody and observed dynamically using the Zeiss LSM510 Meta confocal microscope. Seven images consisting of 0.5  $\mu\text{m}$  deep Z-stacks were collected every 28.7 sec. Image slices near the coverslip were selected and exported as QuickTime movies. Playback rates were 173 $\times$  faster than real time.

**SUPPLEMENTARY MOVIE S3.** *Dynamic movement of WAVE2-CFP (blue) and SLP-76-YFP (yellow) in live activated J14 SLP-76 deficient T cells-* FRET efficiency of the interaction between WAVE2 and SLP76 was calculated throughout T cell spreading. Cells were dropped onto stimulatory-coverslips coated with monoclonal anti-CD3 and observed dynamically using the Zeiss LSM510 Meta confocal microscope. Five images consisting of 0.5  $\mu\text{m}$  deep Z-stacks were collected every 77.7 sec. Image slices were exported as QuickTime movies. Playback rates were 468 $\times$  faster than real time.
